# Supplementary material for: A robust hierarchical microcapsule for efficient supercapacitors exhibiting an ultrahigh current density of 300 A g−1
Source: Royal Society of Chemistry journal article supplement (doi:10.1039/c8ta00255j), 2018-01-01
Supplement: c8ta00255j1.pdf [file c8ta00255j1.pdf]

## A Robust Hierarchical Microcapsule for Efficient Supercapacitors Bearing Ultrahigh Current Density of 300 A/g

Cheng Yang, Minjie Shi, Xuefeng Song\*, Xiaofeng Zhao, Liping Zhao, Jing Liu, Peng Zhang, Lian Gao\*

State Key Laboratory for Metallic Matrix Composite Materials, School of Materials Science and Engineering, Shanghai Jiao Tong University, Shanghai 200240, P. R. China

\*E-mail: songxfeng@sjtu.edu.cn (X. F. Song); liangao@mail.sic.ac.cn (L. Gao)

### **Synthesis of ZIF-8-derived nanoporous carbon (NPC)**

NPC is derived from a zeolitic imidazole metal–organic framework (ZIF-8). Typically, zinc acetate (48 mM) was added to a methanol solution containing polyvinyl pyrrolidone (PVP, K30) (0.4 mM) to obtain the PVP-modified  $\text{Zn}(\text{CH}_3\text{COO})_2$ . 200 mL of the as-prepared PVP-modified  $\text{Zn}(\text{CH}_3\text{COO})_2$  solution and methanol solution of 2-Methylimidazole (160 mM, 200 mL) were cooled to 4 °C for 1 h. Sequentially, the two solutions were mixed and incubated at room temperature for 24 hours. The ZIF-8 was obtained by centrifugation, washed with methanol, and dried under vacuum at 60 °C. Finally, the ZIF-8 crystals were calcined under nitrogen atmosphere at 900 °C for 5 hours to acquire ZIF-8-derived NPC.

The mass ratio of the positive electrode ( $\text{NiS}_x@NCV$  microcapsules) to

the negative electrode (NPC) was decided according to the well-known charge balance theory ( $Q_+=Q_-$ ). The charge stored ( $Q$ ) by each electrode depends on the following equation:

$$Q=C\times\Delta V\times m. \quad (1)$$

In order to realize  $Q_+=Q_-$ , the mass balancing can be expressed as follows:

$$m_+/m_-= (C_- \times \Delta V_-)/(C_+ \times \Delta V_+). \quad (2)$$

Based on the above analysis of the specific capacitances and the potential windows of the  $\text{NiS}_x@\text{NCV}$  microcapsules and NPC from galvanostatic discharge curves in a three electrode cell, as shown in Figure 3 and 4, the optimal mass ratio between the two electrodes should be  $m(\text{NiS}_x@\text{NCV})/m(\text{NPC})=0.5$  in the asymmetric supercapacitor cell. In each cell, the weight of  $\text{NiS}_x@\text{NCV}$  and NPC are 0.5 mg and 1 mg, respectively.

The specific capacitance, energy and power density of assembled ASCs were calculated from the galvanostatic discharge curve according to the two-electrode systematic calculation method:

$$C=4I\Delta t/m\Delta V \quad (3)$$

$$E=C(\Delta V)^2/7.2 \quad (4)$$

$$P=3600\cdot E/\Delta t \quad (5)$$

where  $C$  (F/g) is the specific capacitance,  $E$  (Wh/kg) is the energy density,  $P$  (W/kg) is the power density,  $I$  is the discharge current,  $\Delta t$  is the discharge

time,  $\Delta V$  is the voltage variation during the discharge process after “IR drop”,  $m$  (mg) is the electrode weight. Additionally, the electrochemical performances and specific capacitance of single  $\text{NiS}_x@\text{NCV}$  or NPC electrode are measured and calculated according to the three-electrode systematic method.

The ion diffusion coefficient,  $D$ , can be calculated from the Warburg region using the following equation:

$$D = \frac{R^2 T^2}{2A^2 n^4 F^4 C_0^2 \sigma_\omega^2} \quad (1)$$

In eqn (1),  $R$  is the gas constant,  $T$  is the absolute temperature,  $F$  is the Faraday constant,  $n$  is the number of electrons transferred per molecule,  $A$  is the active surface area of the electrode,  $C_0$  is the concentration of ions in the electrolyte (6 M KOH),  $D$  is the apparent ion diffusion coefficient, and  $\sigma_\omega$  the Warburg factor, which is related to  $Z'$  and can be obtained from the slope of the fitting line of the EIS data at low frequencies according to eqn (2).

$$Z' = R_e + R_{ct} + \sigma_\omega \omega^{-1/2} \quad (2)$$

$R_e$  is the resistance between electrode and electrolyte,  $R_{ct}$  is the charge transfer resistance, and  $\sigma_\omega$  is the Warburg factor obtained from the slope of the fitting line in Randles plot. That is to say, the ion diffusion coefficient is mainly determined by the slope of the fitting line in Randles plot.

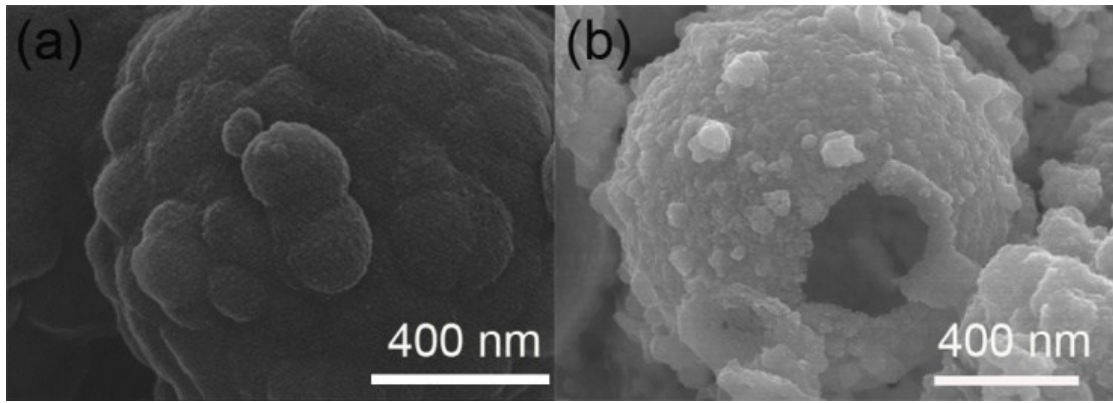

**Fig. S1.** FESEM images of (a) unbroken and (b) partially broken  $\text{NiS}_x\text{@NCV}$  microcapsules.

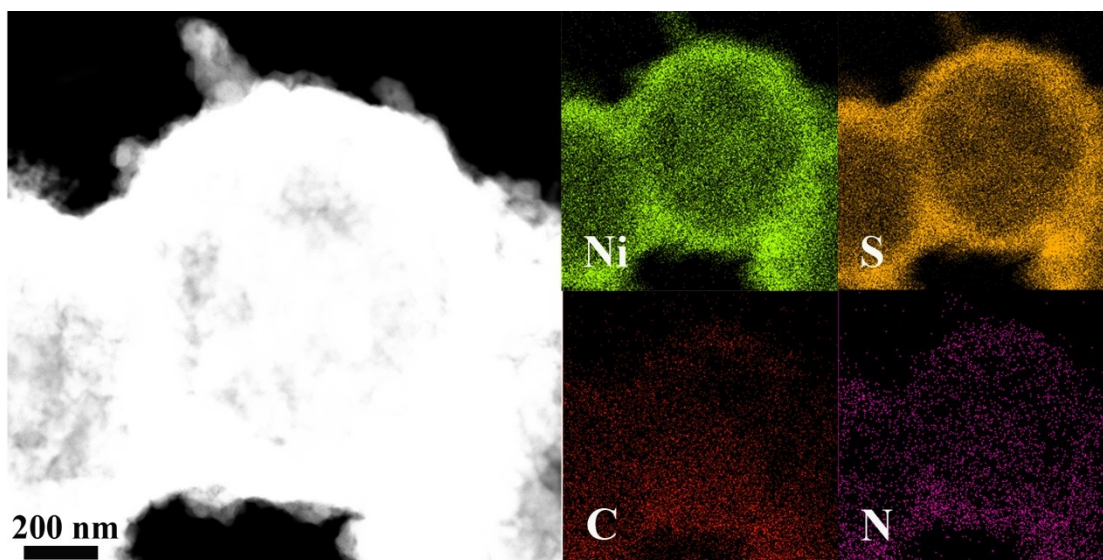

**Fig. S2.** Scanning transmission electron microscopy image of NiS<sub>x</sub>@NCV microcapsules and corresponding elemental mapping images.

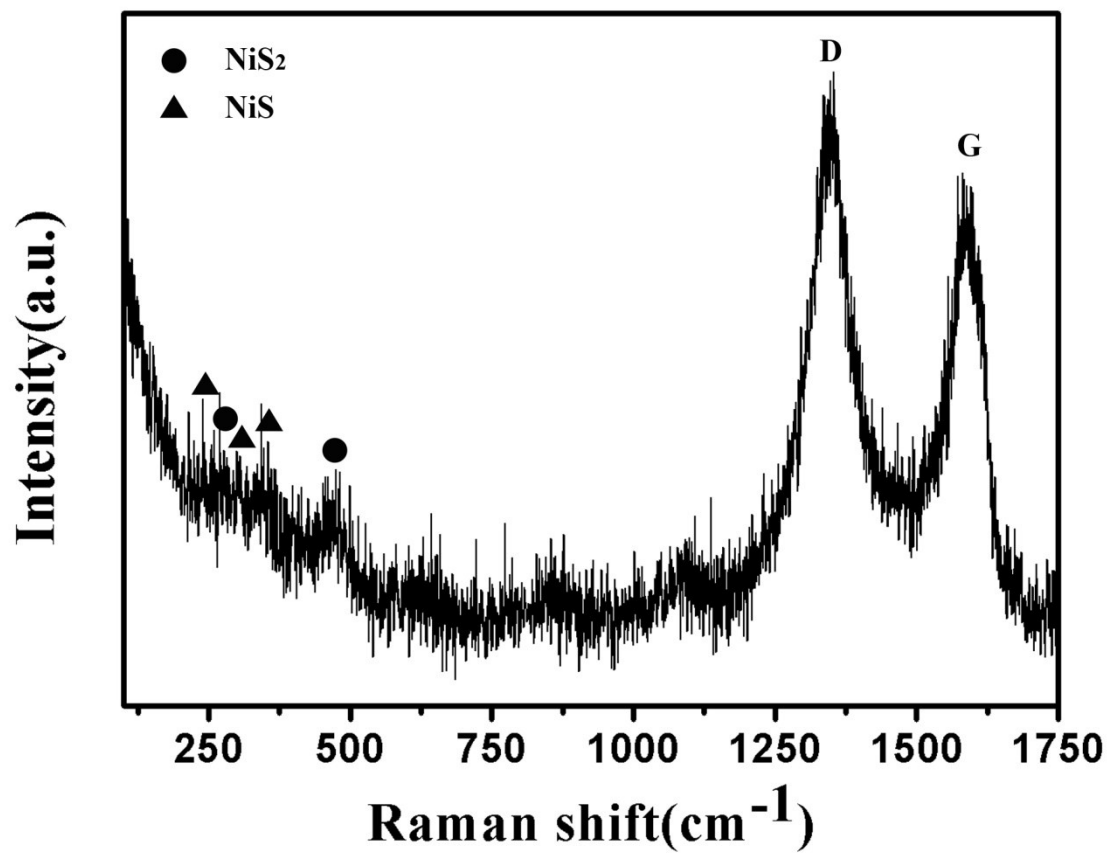

Fig. S3. Raman spectra of NiS<sub>x</sub>@NCV microcapsules.

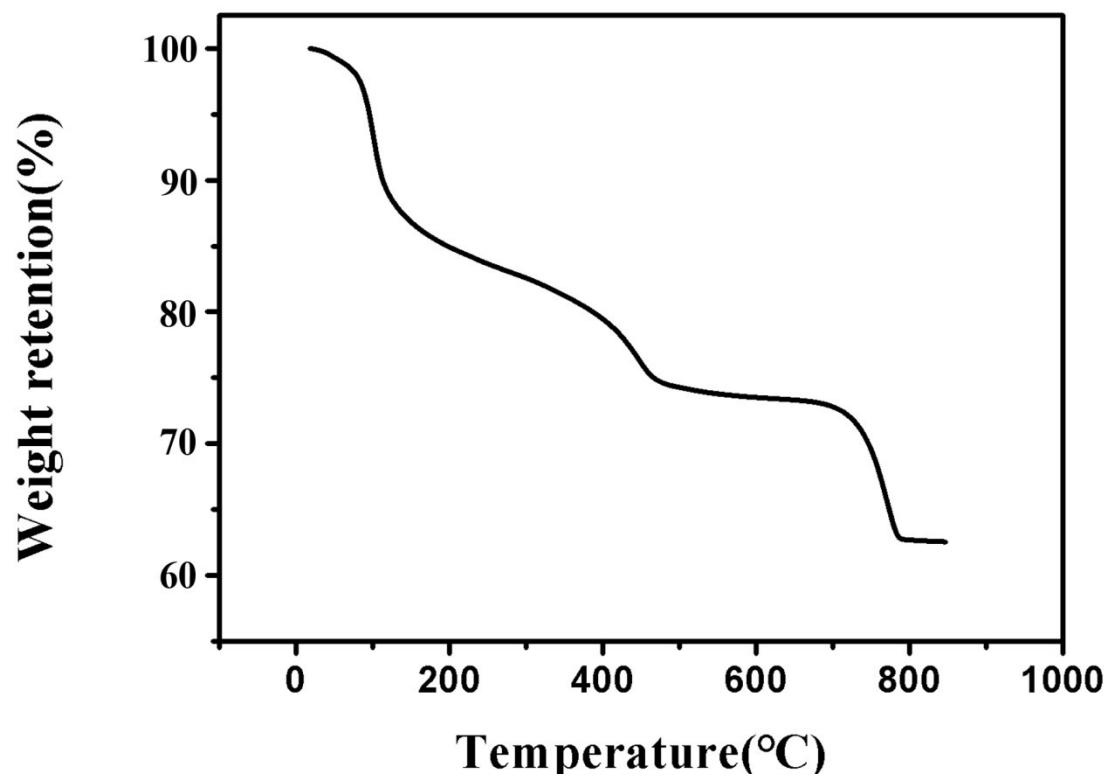

**Fig. S4.** TGA curves of NiS<sub>x</sub>@NCV microcapsules ranging from 25 to 850 °C at a heating rate of 10°C /min under air flow.

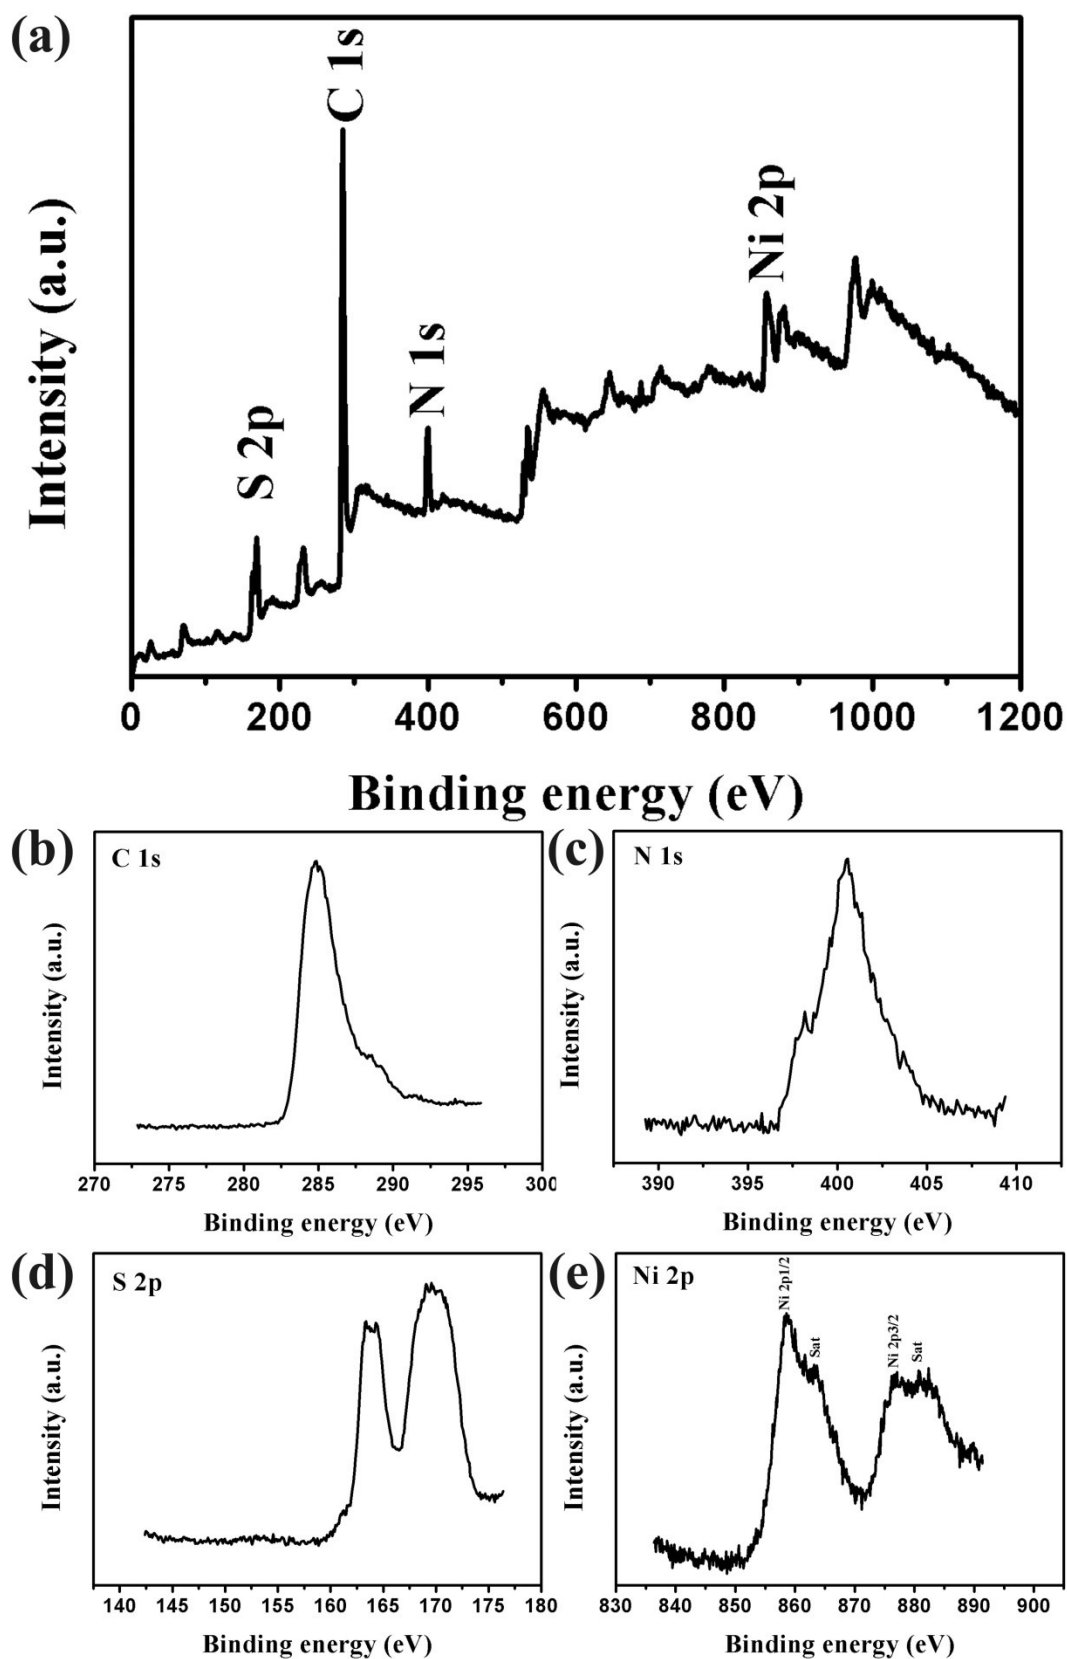

**Fig. S5.** (a) XPS survey spectra of NiS<sub>x</sub>@NCV microcapsules, (b) the narrow spectra of C 1s, (c) the narrow spectra of N 1s, (d) the narrow spectra of S 2p, (e) the narrow spectra of Ni 2p. From characterization for the NiS<sub>x</sub>@NCV, the C coating content, N doping content are 14.82% and 7.72%, respectively.



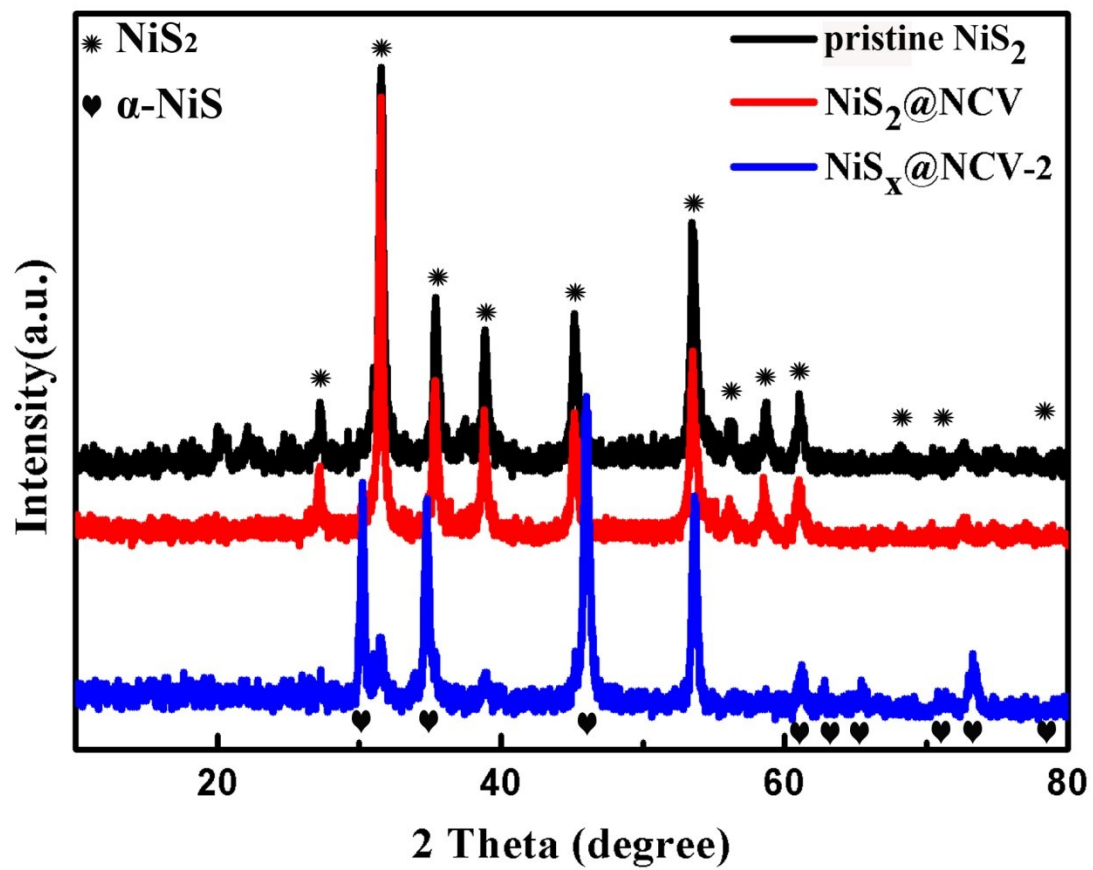

Fig. S6. XRD patterns of the pristine NiS<sub>2</sub>, NiS<sub>2</sub>@NCV and NiS<sub>x</sub>@NCV-2.

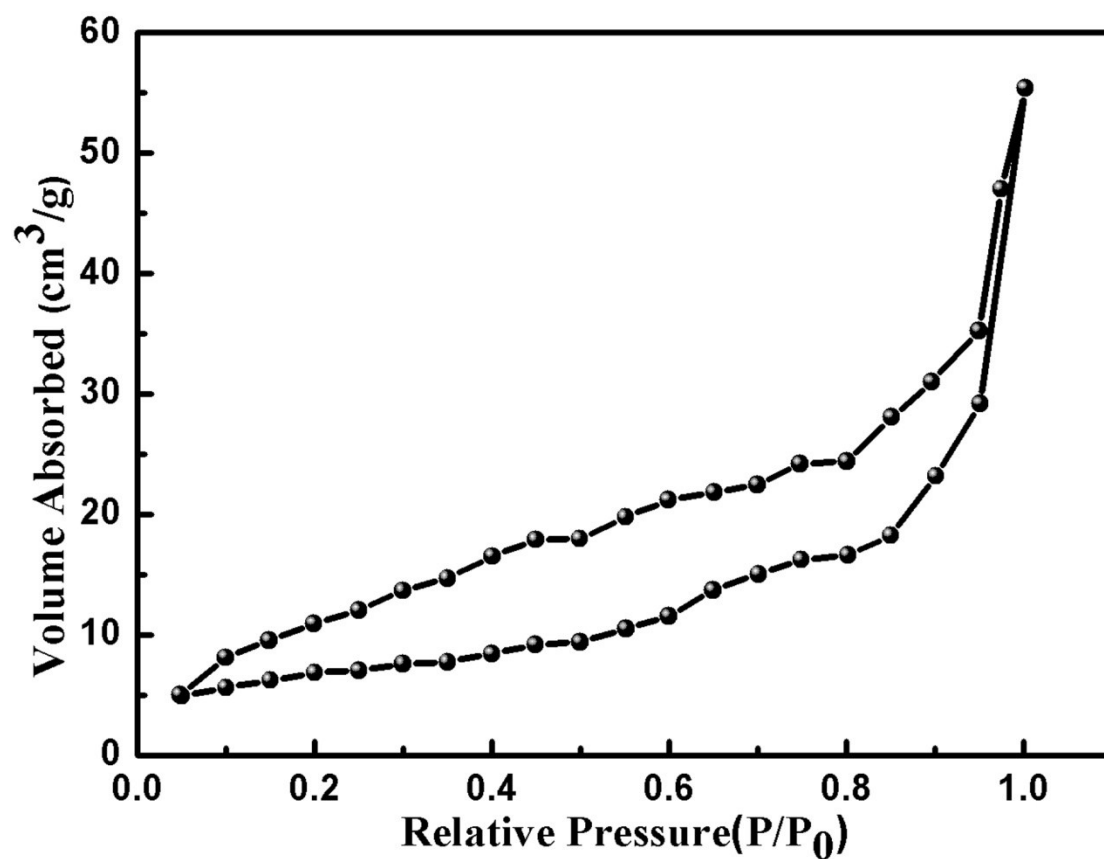

**Fig. S7.** Nitrogen adsorption/desorption isotherm of the pristine NiS<sub>2</sub>. Pristine NiS<sub>2</sub> exhibits smaller specific surface area of 23.77 m<sup>2</sup>/g and pore volume of 0.059 cm<sup>3</sup>/g, which limits the accumulation of effective electron charges and ion diffusion during the electrochemical reaction.

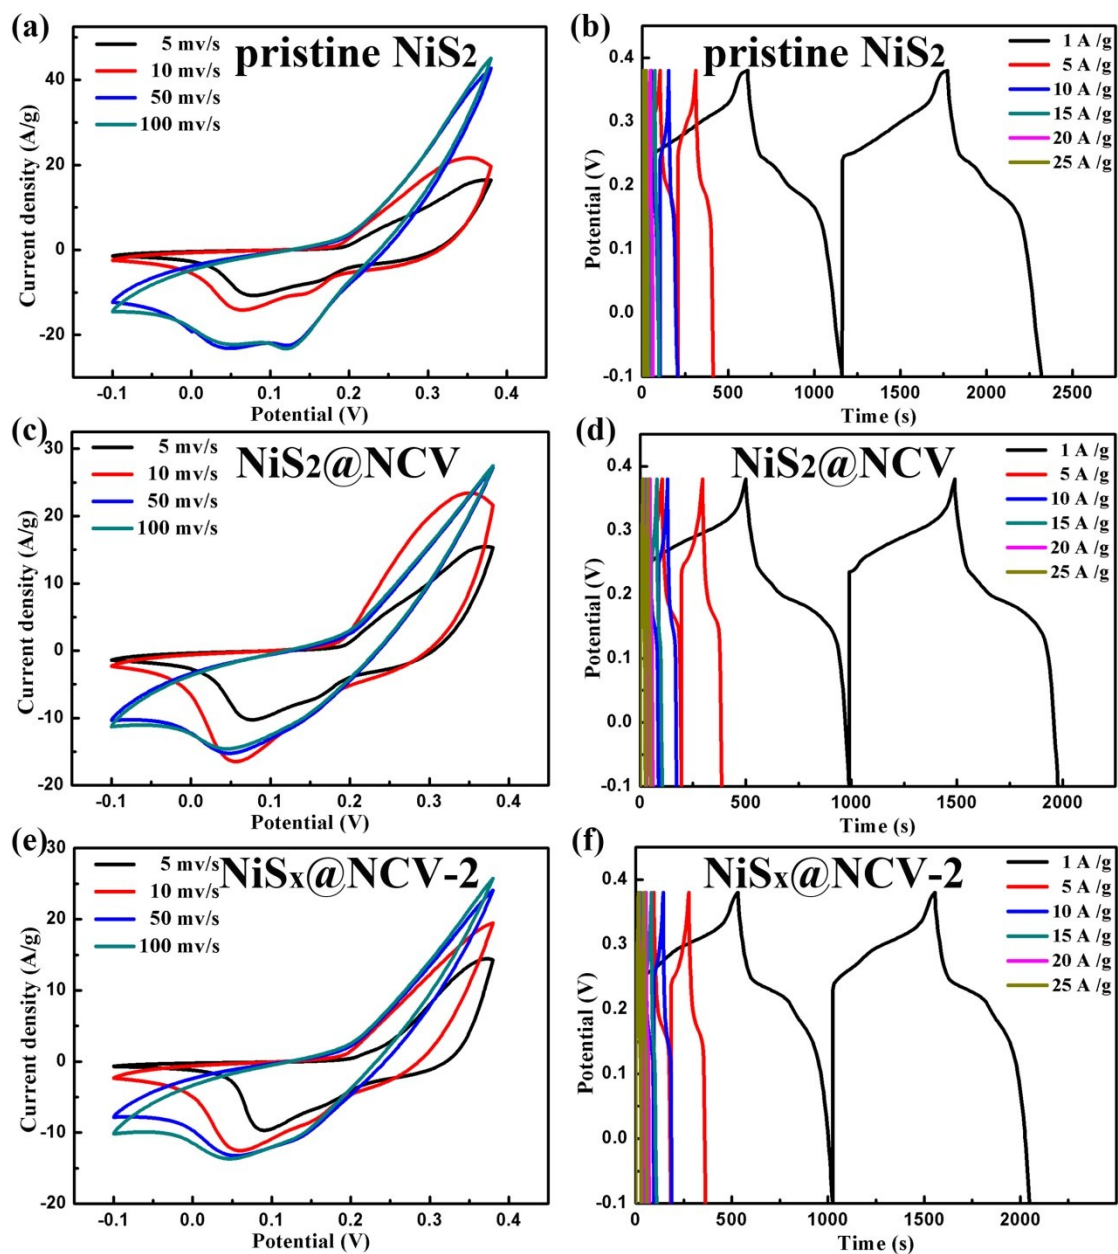

**Fig. S8.** (a)(c)(e) CV curves at various scan rates (5~100 mV/s) and (b) (d) (f) corresponding GCD curves at different current densities (1~25 A/g) of the pristine NiS<sub>2</sub>, NiS<sub>2</sub>@NCV and NiS<sub>x</sub>@NCV-2 electrodes, respectively. As the scan rate increases, the shapes of the CV curves of pristine NiS<sub>2</sub> and NiS<sub>2</sub>@NCV become deformed, while the redox peaks become seriously shifted and even disappear, indicating that pristine NiS<sub>2</sub> and NiS<sub>2</sub>@NCV have poor rate capability. As the annealing time prolonged, the amount of  $\alpha$ -NiS increased while NiS<sub>2</sub> decreased within obtained NiS<sub>x</sub>@NCV-2.

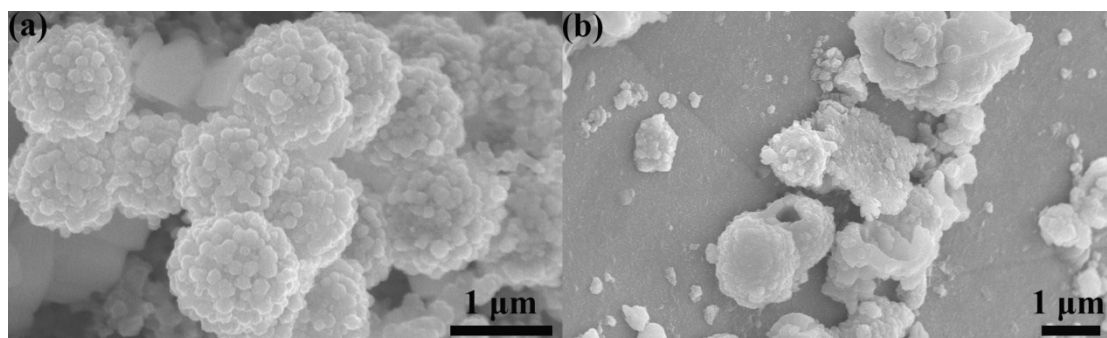

**Fig. S9.** FESEM images of (a) NiS<sub>x</sub>@NCV and (b) pristine NiS<sub>2</sub> electrodes after 5 000 cycles at 1 A/g.

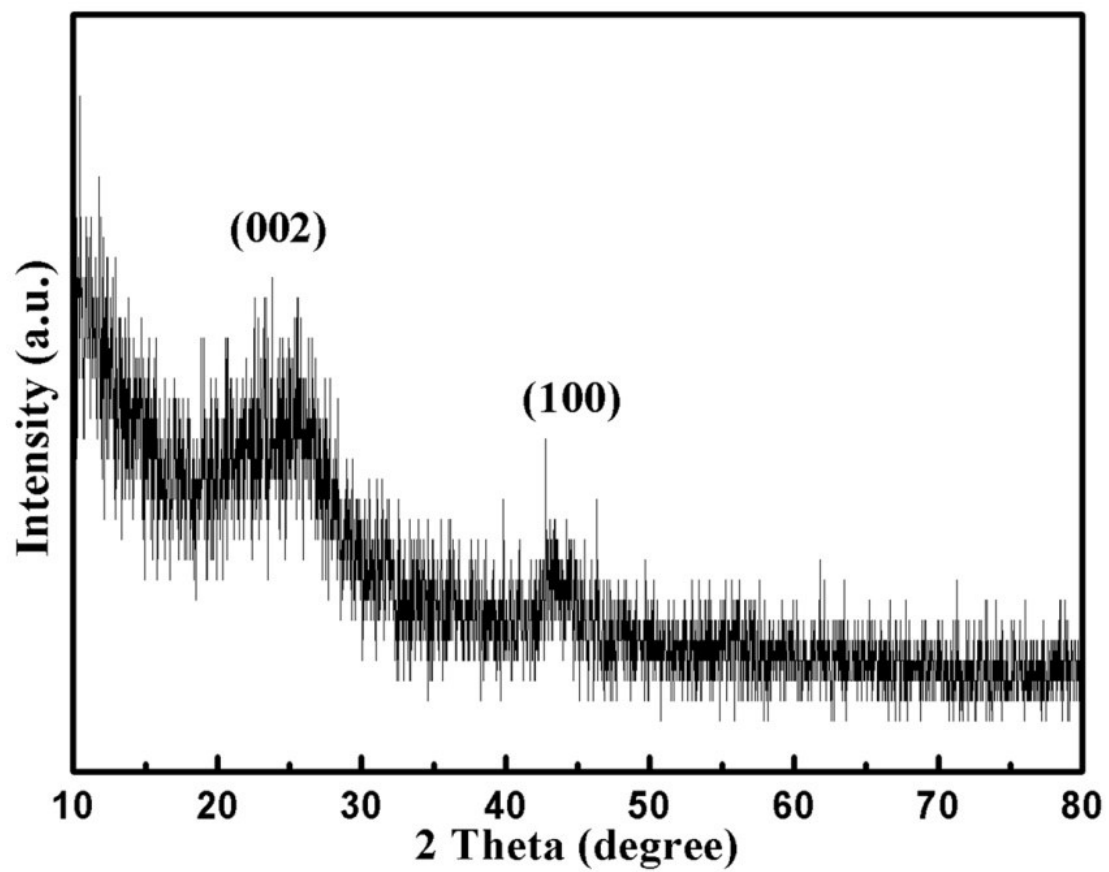

Fig. S10. XRD pattern of the nanoporous carbon particles.

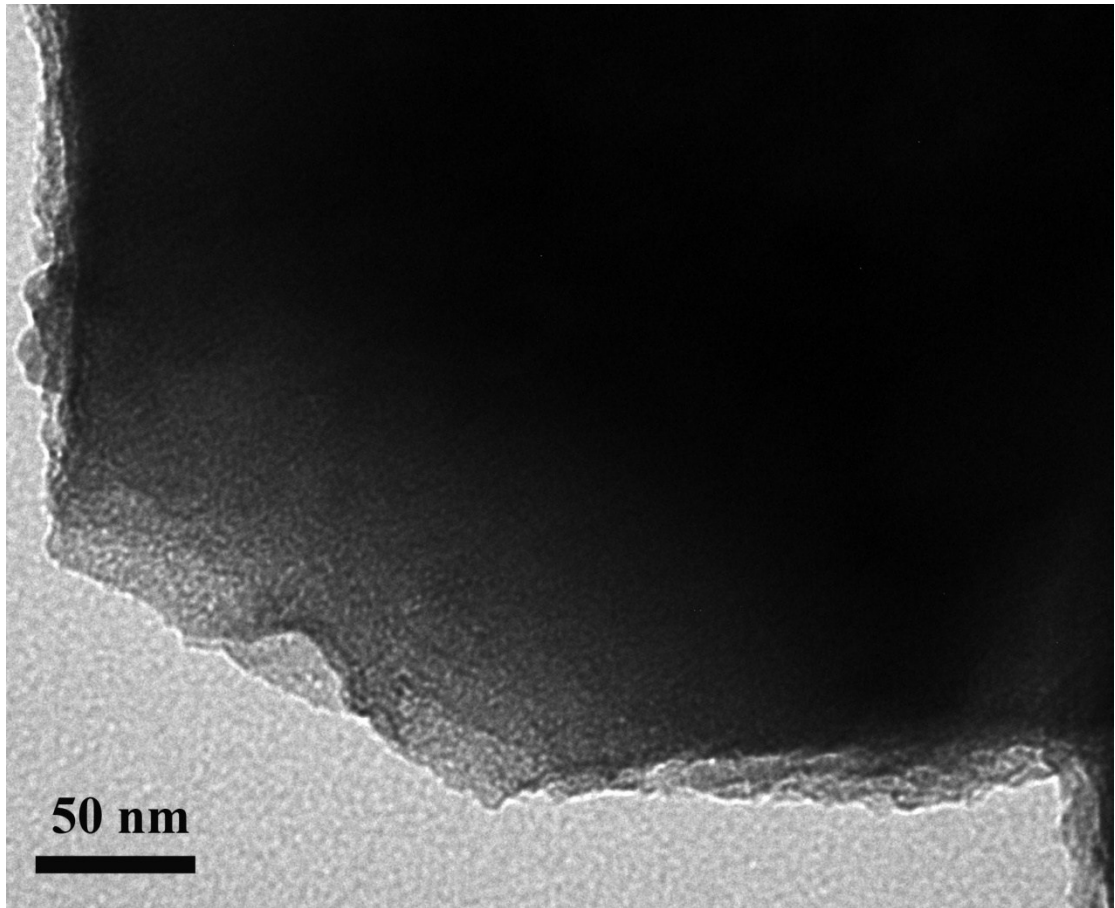

**Fig. S11.** TEM image on the edge of the NPC. There are abundant pores ( $\sim 2.5$  nm) existed in the carbon particles, which are easily accessible by electrolyte ions.

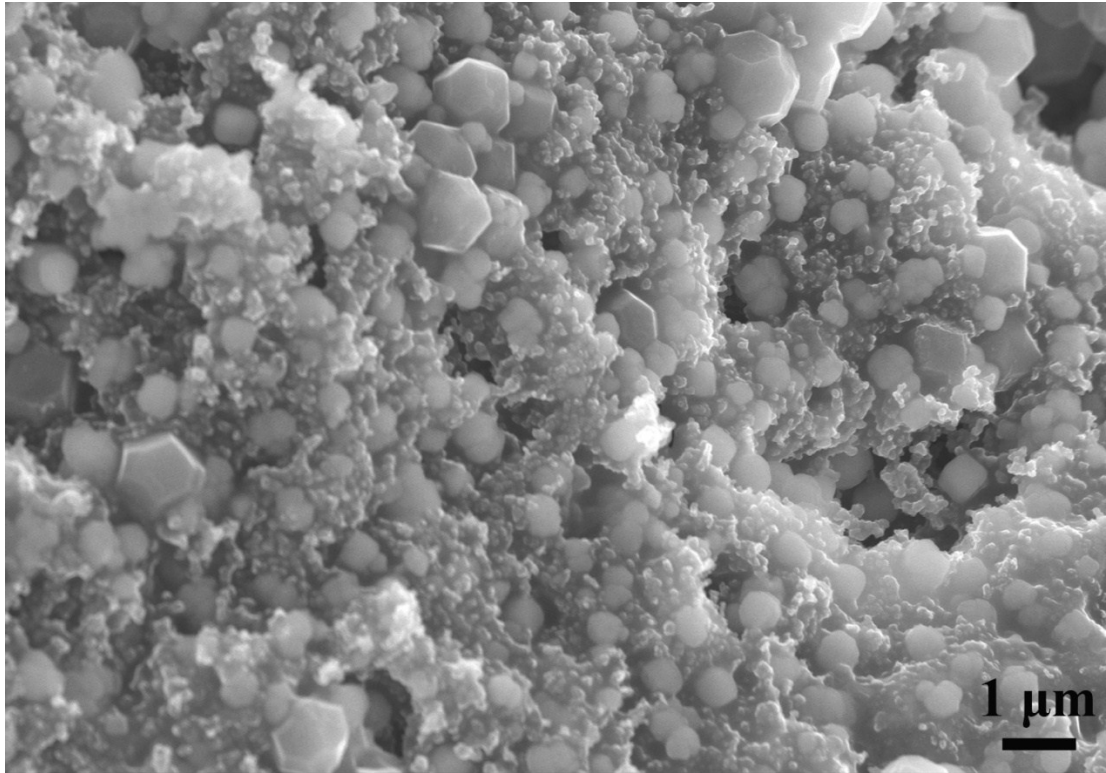

**Fig. S12.** FESEM image of the NPC electrode after 5000 cycles at 1 A/g.

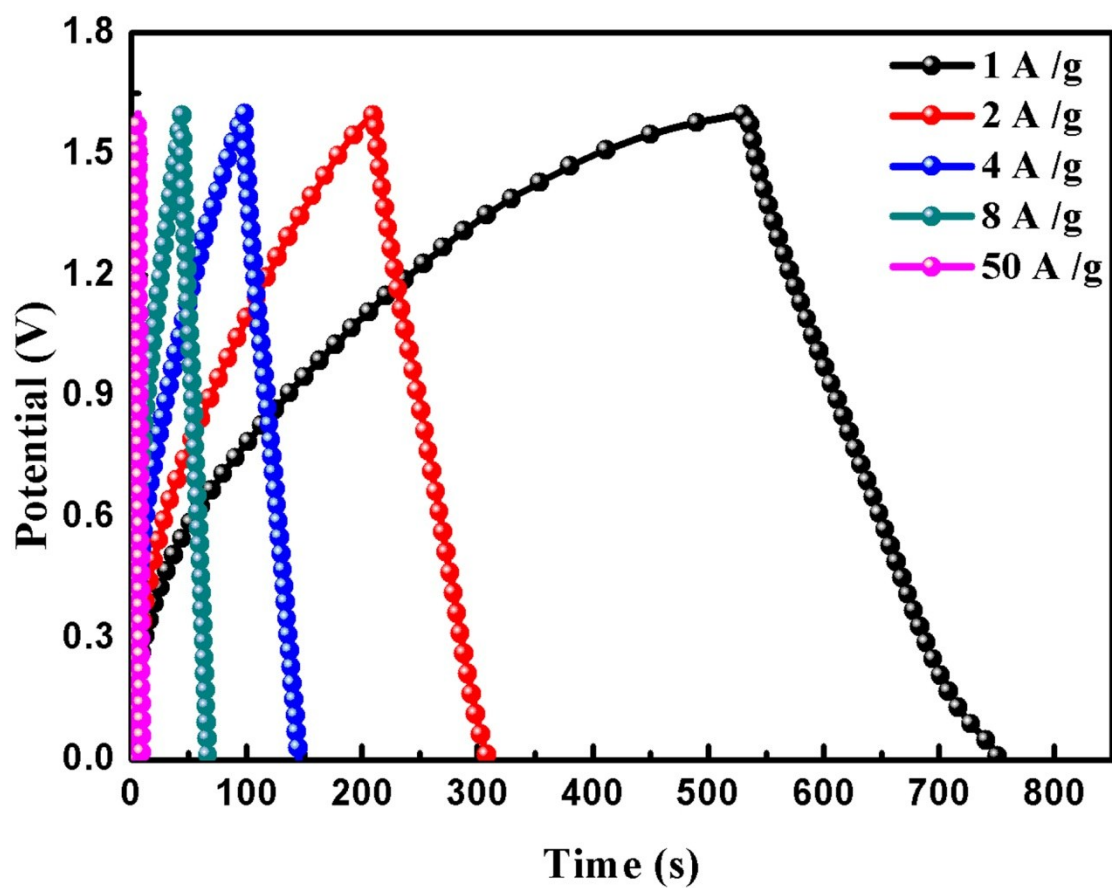

**Fig. S13.** The GCD curves at different current densities (1~50 A/g) of the  $\text{NiS}_x\text{@NCV//NPC}$  asymmetric supercapacitors.



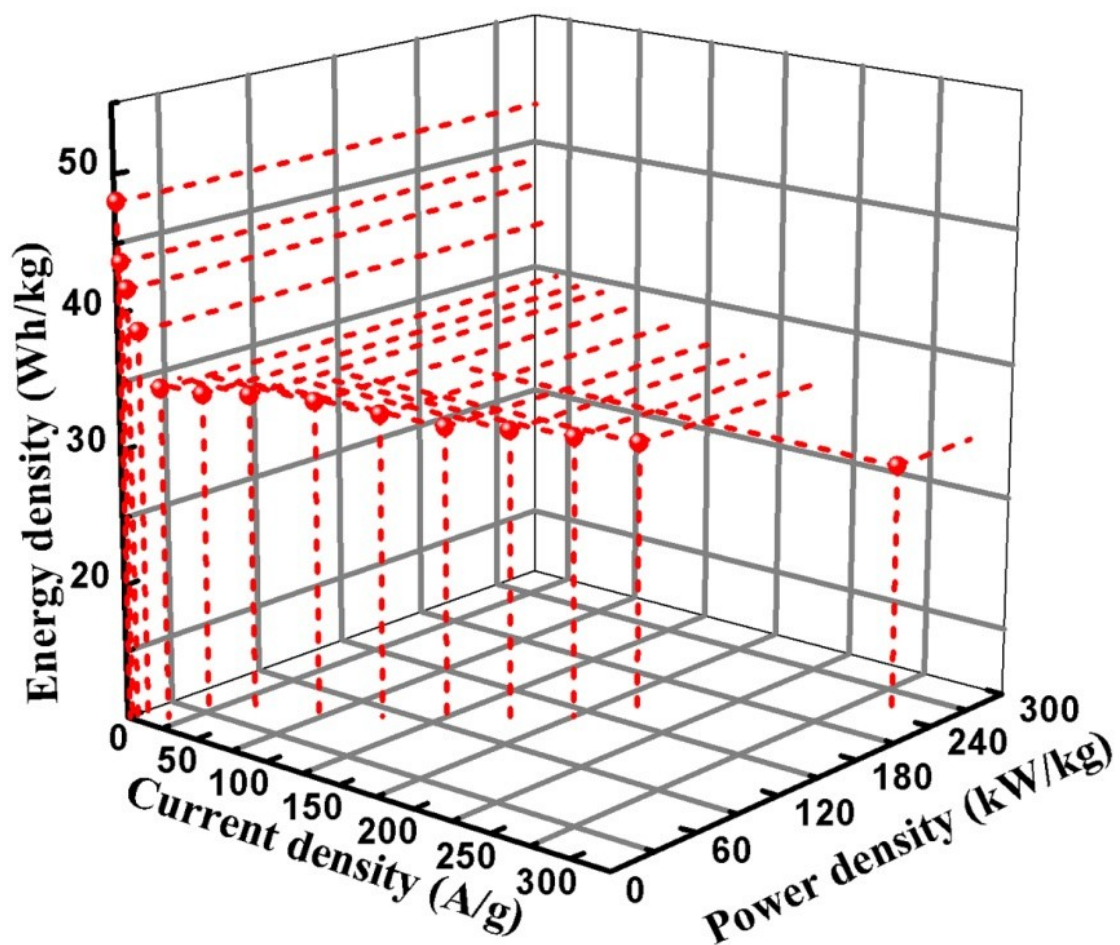

**Fig. S14.** The corresponding values of energy and power density under various current densities (1~300 A/g) of the NiS<sub>x</sub>@NCV//NPC asymmetric supercapacitors.

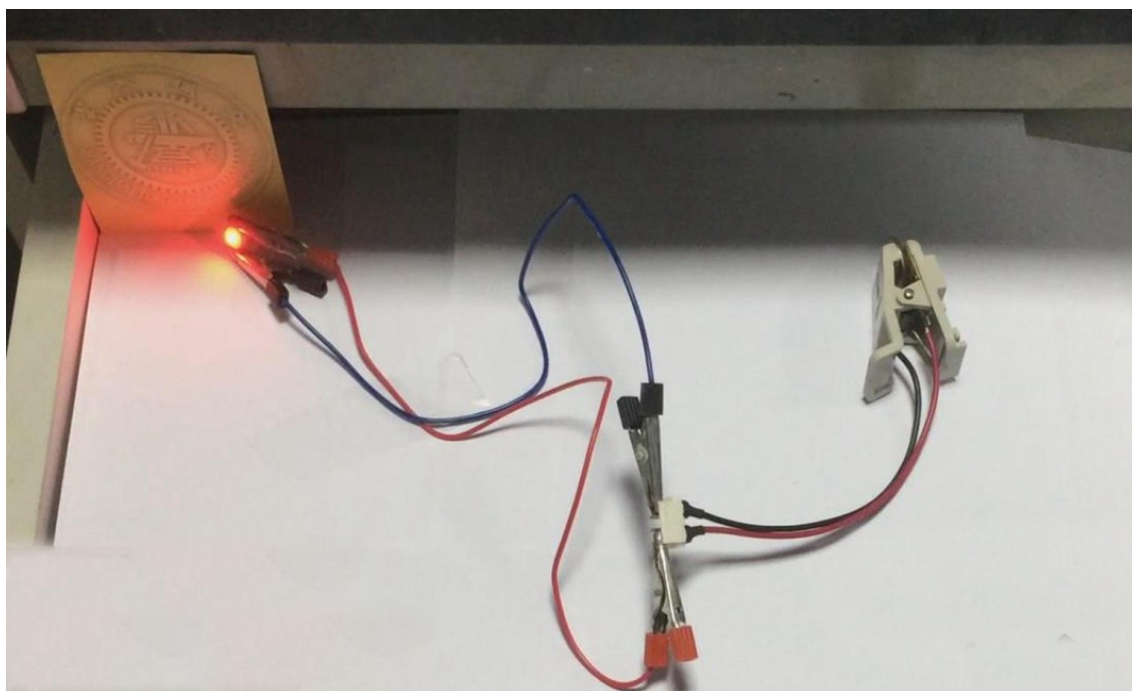

**Fig. S15.** Digital photo of the asymmetric SC. A red lamp can light up with the whole device.

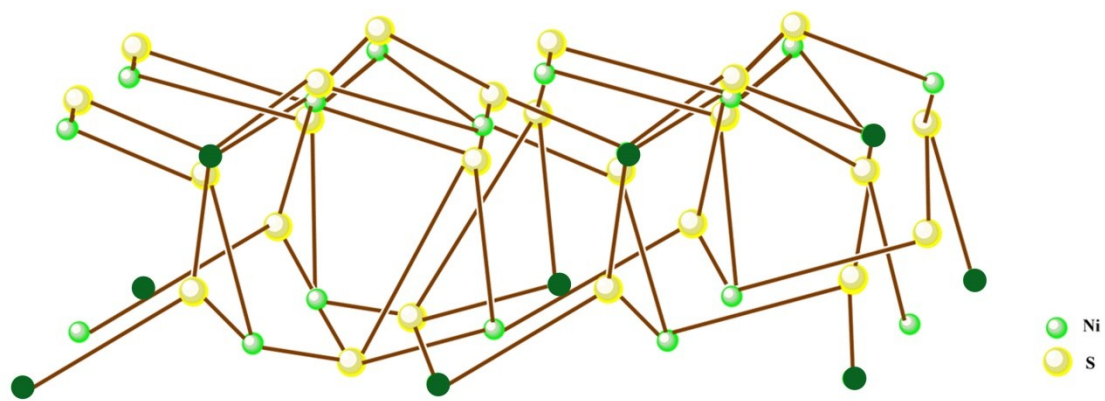

**Fig. S16.** The schematic crystal structure of the NiS<sub>2</sub> of projected based on data of ICSD-43717. The dark green balls denote Ni atoms exposed on the surface.

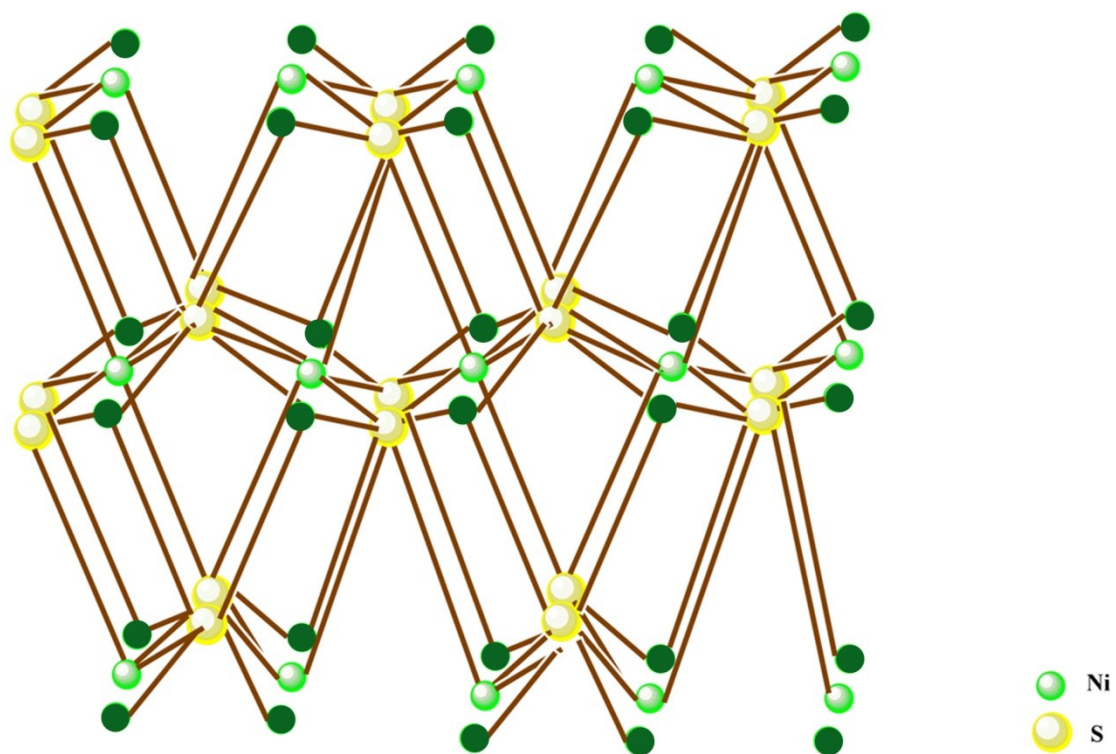

**Fig. S17.** The schematic crystal structure of the  $\alpha$ -NiS of projected based on data of ICSD-42492. The dark green balls denote Ni atoms exposed on the surface.

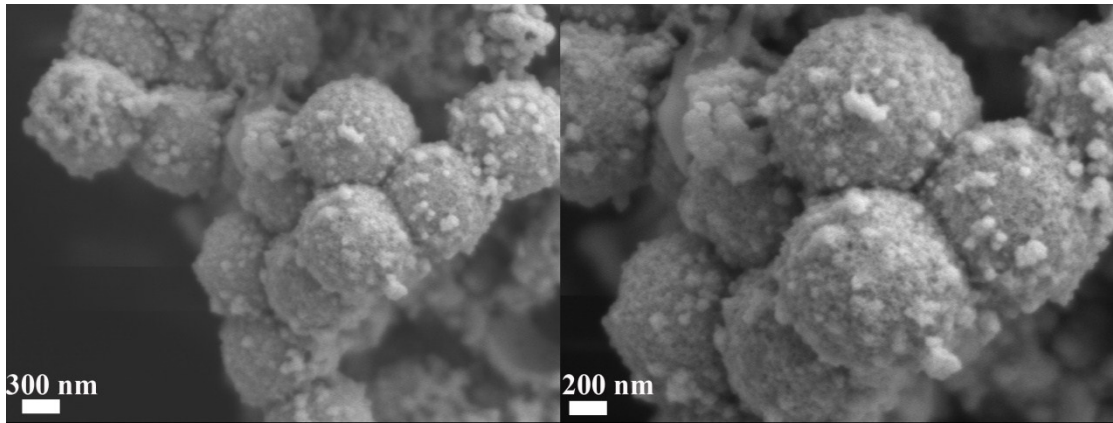

**Fig. S18.** FESEM images of NiS<sub>x</sub>@NCV electrodes after 5 000 cycles at 300 A/g.

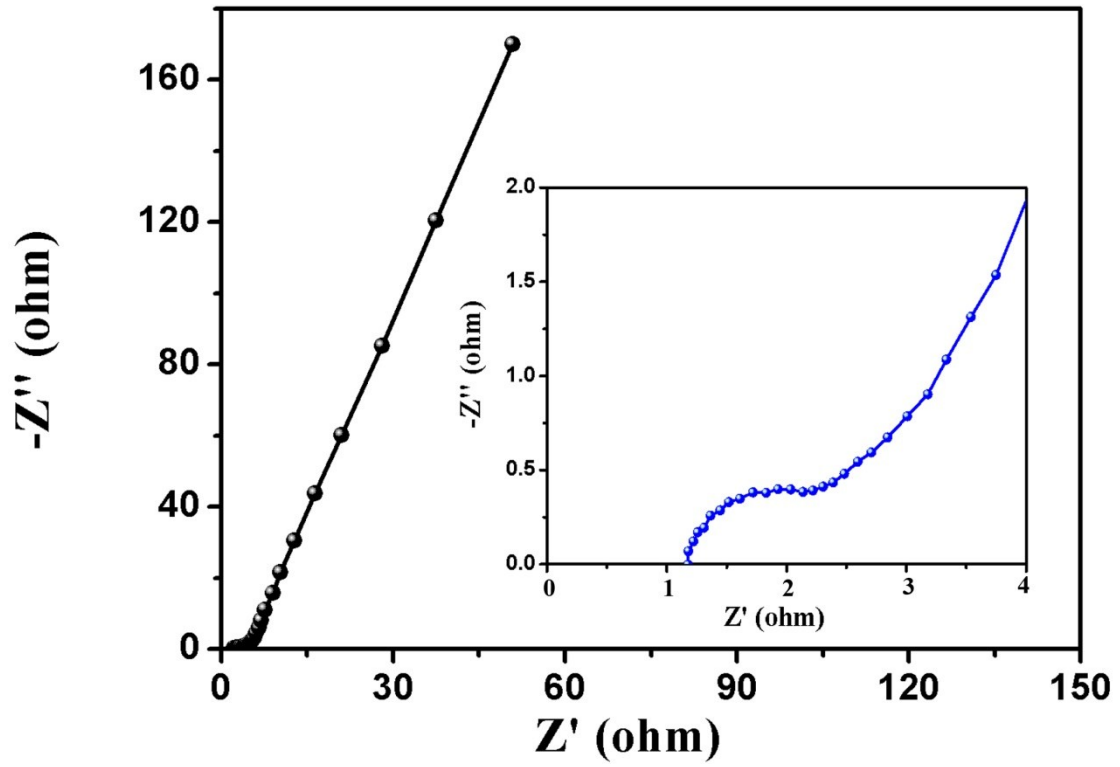

Fig. S19. EIS plot of NiS<sub>x</sub>@NCV//NPC ASC after 5 000 cycles at 300 A/g.

**Table S1.** Comparison study of the rate capability between the NiS<sub>x</sub>@NCV microcapsules electrode in this work and previously reported nickel sulfides based materials.

| Materials                                        | Capacitance (F/g) | Rate capability  | Ref       |
|--------------------------------------------------|-------------------|------------------|-----------|
| NiS <sub>2</sub> nanocubes                       | 695 (1.25 A/g)    | 22.7% (12.5 A/g) | [1]       |
| NiS nanoframes                                   | 2112 (1 A/g)      | 33.6% (20 A/g)   | [2]       |
| NiS nanorods                                     | 1403.8 (1 A/g)    | 35.19% (10 A/g)  | [3]       |
| NiS microflowers                                 | 1122.7 (1 A/g)    | 41.4% (20 A/g)   | [4]       |
| Rod-like NiS <sub>2</sub>                        | 1020.2 (1 A/g)    | 52% (10 A/g)     | [5]       |
| NiS <sub>2</sub> /ZnS                            | 1198 (1 A/g)      | 49.3% (10 A/g)   | [6]       |
| Flower-like β-NiS                                | 965.98 (0.5 A/g)  | 49% (10 A/g)     | [7]       |
| Ni <sub>3</sub> S <sub>2</sub> /MWCNT            | 1024 (0.8 A/g)    | 46.8% (25 A/g)   | [8]       |
| Ni <sub>3</sub> S <sub>4</sub> @MoS <sub>2</sub> | 1440.9 (2 A/g)    | 55% (20 A/g)     | [9]       |
| NiS <sub>2</sub> /NiO                            | 2251 (1 A/g)      | 48% (20 A/g)     | [10]      |
| CNT@Ni <sub>3</sub> S <sub>2</sub>               | 585 (1 A/g)       | 61.8% (13.3 A/g) | [11]      |
| NiS hollow spheres                               | 927 (4.08 A/g)    | 62.8% (10.2 A/g) | [12]      |
| NiS/rGO aerogel                                  | 852 (2 A/g)       | 61.7% (15 A/g)   | [13]      |
| NiS/CRs                                          | 1092 (1 A/g)      | 67.7% (10 A/g)   | [14]      |
| NiS <sub>2</sub> /CoS <sub>2</sub>               | 954.3 (1 A/g)     | 32.4% (20 A/g)   | [15]      |
| NiS <sub>x</sub> @NCV microcapsules              | 1600 (1 A/g)      | 84.25% (25 A/g)  | This work |

**Table S2.** Comparison study of the rate capability, energy density and power density between the NiS<sub>x</sub>@NCV//NPC ASCs in this work and previously reported nickel sulfides based SCs.

| Device                                    | Rate capability                   | Energy density (Wh/kg) | Power density (KW/kg) | Ref       |
|-------------------------------------------|-----------------------------------|------------------------|-----------------------|-----------|
| Ni <sub>3</sub> S <sub>2</sub> /MWCNT//AC | 62.7%<br>(16 A/g)                 | 19.8                   | 0.798                 | [8]       |
|                                           |                                   | 11.03                  | 12.1                  |           |
| Rod-like NiS <sub>2</sub> //rGO           | 36.1%<br>(15 A/g)                 | 32.76                  | 0.954                 | [5]       |
|                                           |                                   | 11.19                  | 13.52                 |           |
| NiS/NF//AC                                | 32.4%<br>(50 mA/cm <sup>2</sup> ) | 38.4                   | 0.1666                | [16]      |
|                                           |                                   | 11                     | 3.9                   |           |
| NiS microflower//AC                       | 43.7%<br>(10 A/g)                 | 31                     | 0.9                   | [4]       |
|                                           |                                   | 12.9                   | 8.8                   |           |
| Ni <sub>3</sub> S <sub>2</sub> //AC       | 37.3%<br>(2 A/g)                  | 34.6                   | 0.15                  | [17]      |
|                                           |                                   | 12.9                   | 1.5                   |           |
| MCs@GNS@NiS                               | 64.9%<br>(5 A/g)                  | 17.2                   | 0.103                 | [18]      |
|                                           |                                   | 11.2                   | 1.008                 |           |
| NiS <sub>2</sub> -CoS <sub>2</sub> //AC   | 45.7%<br>(10 A/g)                 | 29.3                   | 0.7                   | [15]      |
|                                           |                                   | 13.4                   | 7.4                   |           |
| NiS/RGO//AC                               | 62.1%<br>(4 A/g)                  | 18.7                   | 0.124                 | [13]      |
|                                           |                                   | 11.6                   | 2.9                   |           |
| Ni <sub>3</sub> S <sub>2</sub> @β-NiS//AC | 39.8%<br>(30 A/g)                 | 55.1                   | 0.9259                | [19]      |
|                                           |                                   | 22.2                   | 28.1                  |           |
| NiS <sub>2</sub> /ZnS//AC                 | 68%<br>(10 A/g)                   | 28                     | 0.7489                | [6]       |
|                                           |                                   | 19.4                   | 7.509                 |           |
| Ni <sub>3</sub> S <sub>2</sub> /CNF//CNF  | 62.5%<br>(10 A/g)                 | 25.8                   | 0.425                 | [20]      |
|                                           |                                   | 15.2                   | 6.8                   |           |
| NiS//ZIF-8 derived carbon                 | 78%<br>(9 A/g)                    | 17.01                  | 2.28                  | [21]      |
|                                           |                                   | 13.42                  | 10.283                |           |
| NiS <sub>x</sub> @NCV//NPC                | 87%<br>(300 A/g)                  | 48.02                  | 0.8                   | This work |
|                                           |                                   | 30                     | 240                   |           |

## References

- [1] H. Pang, C. Wei, X. Li, G. Li, Y. Ma, S. Li, J. Chen, J. Zhang, *Sci. Rep.* 4 (2014).
- [2] X. Y. Yu, L. Yu, H. B. Wu, X. W. Lou, *Angew. Chem. Int. Ed.* 54 (2015) 5331-5335.
- [3] Z. Wang, C. Nan, D. Wang, Y. Li, *Rsc Adv.* 4 (2014) 47513-47516.
- [4] B. Guan, Y. Li, B. Yin, K. Liu, D. Wang, H. Zhang, C. Cheng, *Chem. Eng. J.* 308 (2017) 1165-1173.



- [5] Y. Ruan, J. Jiang, H. Wan, X. Ji, L. Miao, L. Peng, B. Zhang, L. Lv, J. Liu, *J. Power Sources* 301 (2016) 122-130.
- [6] G. C. Li, M. Liu, M. K. Wu, P.-F. Liu, Z. Zhou, S. R. Zhu, R. Liu, L. Han, *Rsc Adv.* 6 (2016) 103517-103522.
- [7] J. Yang, X. Duan, Q. Qin, W. Zheng, *J. Mater. Chem. A* 1 (2013) 7880-7884.
- [8] C. S. Dai, P. Y. Chien, J. Y. Lin, S. W. Chou, W. K. Wu, P. H. Li, K. Y. Wu, T. W. Lin, *Acs Appl. Mater. Interfaces* 5 (2013) 12168-12174.
- [9] Y. Zhang, W. Sun, X. Rui, B. Li, H.T. Tan, G. Guo, S. Madhavi, Y. Zong, Q. Yan, *Small* 11 (2015) 3694-3702.
- [10] D. Zhang, X. Zhou, K. Ye, Y. Li, C. Song, K. Cheng, D. Cao, G. Wang, Q. Li, *Electrochim. Acta* 173 (2015) 209-214.
- [11] T. Zhu, H.B. Wu, Y. Wang, R. Xu, X.W. Lou, *Adv. Energy Mater.* 2 (2012) 1497-1502.
- [12] T. Zhu, Z. Wang, S. Ding, J. S. Chen, X. W. Lou, *Rsc Adv.* 1 (2011) 397-400.
- [13] F. Cai, R. Sun, Y. Kang, H. Chen, M. Chen, Q. Li, *Rsc Adv.* 5 (2015) 23073-23079.
- [14] C. Sun, M. Ma, J. Yang, Y. Zhang, P. Chen, W. Huang, X. Dong, *Sci. Rep.* 4 (2014).
- [15] H. Zhang, B. Guan, J. Gu, Y. Li, C. Ma, J. Zhao, T. Wang, C. Cheng, *Rsc Adv.* 6 (2016) 58916-58924.
- [16] L. Yu, B. Yang, Q. Liu, J. Liu, X. Wang, D. Song, J. Wang, X. Jing, *J. Electroanal. Chem.* 739 (2015) 156-163.
- [17] H. H. Huo, Y. Q. Zhao, C. L. Xu, *J. Mater. Chem. A* 2 (2014) 15111-15117.
- [18] Y. Li, K. Ye, K. Cheng, J. Yin, D. Cao, G. Wang, *J. Power Sources* 274 (2015) 943-950.
- [19] W. Li, S. Wang, L. Xin, M. Wu, X. Lou, *J. Mater. Chem. A* 4 (2016) 7700-7709.
- [20] W. D. Yu, W. R. Lin, X. F. Shao, Z. X. Hu, R. C. Li, D. S. Yuan, *J. Power Sources* 272 (2014) 137-143.
- [21] P. R. Jothi, R. R. Salunkhe, M. Pramanik, S. Kannan, Y. Yamauchi, *Rsc Adv.* 6 (2016) 21246-21253.
